# Supplementary material for: LINC01526 Promotes Proliferation and Metastasis of Gastric Cancer by Interacting with TARBP2 to Induce GNG7 mRNA Decay
Source: MDPI journal article supplement (doi:10.3390/cancers14194940), 2022-10-09
Supplement: s1 [file s1]

**Supplementary Table S3. sRSEs in the 3'UTR of GNG7**

| <b>Index</b> | <b>Sequence</b>     | <b>Length</b> | <b>3UTR<br/>Start</b> | <b>3UTR<br/>End</b> | <b>Stem loop</b> | <b>GC<br/>ratio</b> |
|--------------|---------------------|---------------|-----------------------|---------------------|------------------|---------------------|
| 1            | UGUCUCUGUCUCAGGCA   | 17            | 59                    | 75                  | ((((.....))))    | 52.94%              |
| 2            | GGCCUCUCAGUUUGGGCC  | 19            | 238                   | 256                 | ((((.....))))    | 68.42%              |
| 3            | GAUGGUUGAACCCGUC    | 16            | 583                   | 598                 | ((((.....))))    | 56.25%              |
| 4            | GAGGCCGGGAGAUGCCUU  | 18            | 1424                  | 1441                | ((((.....))))    | 66.67%              |
| 5            | AACCCGUGCCGAGAGGGUU | 19            | 1744                  | 1762                | ((((.....))))    | 63.16%              |
| 6            | GCGUCCCCACACGC      | 15            | 2116                  | 2130                | (((.....)))      | 80.00%              |
| 7            | GCUGCUGCAGAGACGCAGC | 19            | 2401                  | 2419                | ((((.....))))    | 68.42%              |
| 8            | GAAGGCCGUUUCUCCUUC  | 18            | 2967                  | 2984                | ((((.....))))    | 55.56%              |
| 9            | CUGGGCACCUUCCCGG    | 16            | 3087                  | 3102                | ((((.....))))    | 75.00%              |
| 10           | UGCCCAAGUUCUGGGGCA  | 18            | 3376                  | 3393                | ((((.....))))    | 61.11%              |
| 11           | GGUGGAGGUGGAGCCACC  | 18            | 3451                  | 3468                | ((((.....))))    | 72.22%              |
