# Supplementary figures and images for: LINC01526 Promotes Proliferation and Metastasis of Gastric Cancer by Interacting with TARBP2 to Induce GNG7 mRNA Decay
Source: MDPI journal article supplement (doi:10.3390/cancers14194940), 2022-10-09

**Fig 4C, TARBP2, HGC-27**

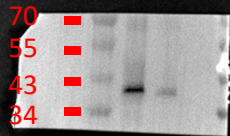

**Fig 4C, TARBP2, AGS**

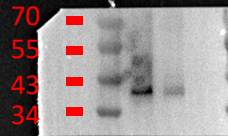

Supplement: s1 [file s1]

**Fig 6E, Tubulin, HGC-27**

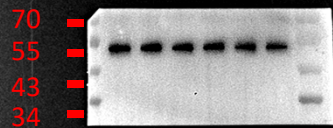

**Fig 6E, TARBP2, HGC-27**

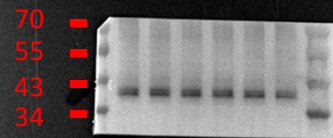

**Fig 6E, Tubulin, AGS**

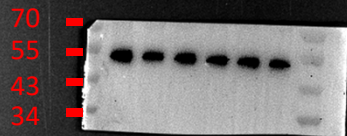

**Fig 6E, TARBP2, AGS**

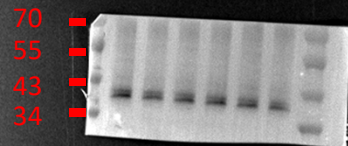

Supplement: s1 [file s1]
